# Supplementary material
Source: publisher figshare collection journal article supplement (https://frontiersin.figshare.com/ndownloader/files/20330772)
Supplement: Supplementary file 1 [file 20330772]

Supplementary Material

**Table 1:** Values for the 6 criteria (ground-water dependence (GD), Red List-status Germany (RLG), “Fauna-Flora-Habitat” (FFH), legal protection status (LP), regenerability (RE) and floodplain specific habitats (FS)) for each RESI habitat-type. 1, very low; 3, medium; 5,very high.

| **RESI code** | **Code according to Finck et al. 2017** | **RESI Biotope type** | **RGL** | **FFH** | **LP** | **RE** | **GD** | **FS** | **MI** |
| --- | --- | --- | --- | --- | --- | --- | --- | --- | --- |
| **10.0** | **23., 24.** | **Water bodies (unspecific)** | **3** | **3** | **3** | **3** | **5** | **5** | **5** |
| 11.0 | **22.** | **Springs** | **3** | **3** | **3** | **5** | **5** | **3** |  |
| 11.1 | 22.01-22.04 | Natural and near-natural springs | 5 | 5 | 5 | 5 | 5 | 3 |  |
| 11.2 | 22.05 | Tapped springs | 1 | 1 | 1 |  | 5 | 1 |  |
| 12.0 | **23** | **Flowing waters (unspecific)** | **3** | **3** | **3** | **5** | **5** | **5** | **5** |
| 12.1 | 23.09 | Temporary watercourses | 5 | 3 | 5 | 3 | 5 | 5 | 4 |
| 12.2 | 23.01 | Natural and near natural running waters | 5 | 5 | 5 | 5 | 5 | 5 | 5 |
| 12.3 | 23.02 | Moderate anthropogenic modified watercourses | 3 | 5 | 1 | 3 | 5 | 3 |  |
| 12.4 | 23.03 | Major anthropogenic modified watercourses | 1 | 1 | 1 |  | 5 | 1 |  |
| 13.0 | **24 without 24.05, 24.06** | **Standing waters in floodplains (unspecific)** | **3** | **3** | **3** | **3** | **5** | **5** | **5** |
| 13.1 |  | Temporary standing waters on floodplains | 5 | 1 | 5 | 3 | 5 | 5 | 4 |
| 13.2 | 24.01, 24.02 | Nutrient poor standing waters on floodplains | 5 | 5 | 5 | 3 | 5 | 5 | 5 |
| 13.3 | 24.03, 24.04 | Nutrient rich standing waters on floodplains | 3 | 5 | 5 | 1 | 5 | 5 | 5 |
| 13.4 | 24.05 | Anthropogenic standing waters on floodplains | 1 | 1 | 1 |  | 5 | 1 |  |
| 14.0 | **23.07.02, 24.03.02, 24.04.02** | **Oxbow and Oxbow lakes** | **5** | **5** | **5** | **3** | **5** | **5** | **5** |
| 15.5 |  | **Post-mining waterbodies** | **3** | **3** | **3** | **1** | **5** | **3** |  |
| 15.1 | 24.02.03, 24.03.04, 24.04.04 | Natural and near natural post-mining waterbodies | 3 | 5 | 5 | 1 | 5 | 3 |  |
| 15.2 | 24.07.12 | Anthropogenic post-mining waterbodies | 1 | 1 | 1 |  | 5 | 1 |  |
| 16.0 |  | **Habitats below mean water level** | **5** | **5** | **5** | **3** | **5** | **5** | **4** |
| 16.1 | 23.08 | Intermittently exposed habitats below mean water level of watercourses | 5 | 5 | 5 | 3 | 5 | 5 | 4 |
| 16.2 | 24.08 | Intermittently exposed habitats below mean water level of standing waters | 3 | 5 | 5 | 3 | 5 | 5 | 4 |
| 17.0 | **23.04, 52.04.02, 23.07.04** | **Embankments** | **1** | **1** | **1** |  | **1** | **1** |  |
| **20.0** |  | **Grassland** | **3** | **3** | **3** | 5 | **3** | **3** |  |
| 21.0 | **35.02** | **Moist/Wetgrassland** | **3** | **3** | **5** | **3** | **5** | **5** | **2** |
| 21.1 | 35.02.01 | Purple moorgrass meadows on floodplains | 5 | 5 | 5 | 3 | 5 | 5 | 3 |
| 21.2 | 35.02.02 | Cnidium dubium floodplain meadows | 5 | 5 | 5 | 3 | 5 | 5 | 3 |
| 21.3 | 35.02.03 | Extensively farmed damp and wet grassland | 5 | 1 | 5 | 3 | 5 | 5 | 2 |
| 21.4 | 35.02.05 | Flooded meadow | 3 | 1 | 5 | 1 | 5 | 5 | 3 |
| 22.0 | 35.02.01.03, 35.02.02.03, 35.02.03.03; 35.02.04.03, 35.02.06.03 | **Abandoned pasture** | **3** | **3** | **3** |  | **5** | **3** |  |
| 23.0 | **34.07** | **Moist/Mesophilic grassland** | **5** | **5** | **3** | **3** | **3** | **3** |  |
| 24.0 | **34.08.01** | **Intensive grassland** | **1** | **1** | **1** |  | **5** | **3** |  |
| **25.0** |  | **(Semi-) dry grassland** | **5** | **5** | **5** | **5** | **1** | **3** |  |
| **25.1** | 34.01 | Xeric grassland | 5 | 5 | 5 | 5 | 1 | 1 |  |
| **25.2** | 34.02, 34.03 | Semi-dry grassland on floodplains | 5 | 5 | 5 | 3 | 1 | 5 | 1 |
| **30.0** |  | **Riverbank vegetation** | **3** | **3** | **1** | **1** | **3** | **3** |  |
| 31.0 | 39.02 | Clear cuttings | **1** | **1** | **1** |  | **1** | **1** |  |
| 32.0 | 39.03 | Herbaceous and grassy frings and vegetation of the open landscape | **3** | **1** | **3** | **1** | **3** | **3** |  |
| 33.0 | 39.04 | Riparian herbaceous and grassy frings and vegetation | **3** | **5** | **1** | **1** | **3** | **5** | **3** |
| 34.0 | 39.05 | Riparian neophytic herb vegetation | **1** | **1** | **1** |  | **3** | **3** |  |
| 35.0 | 39.06.01, 39.06.02 | Dry ruderal sites | **3** | **1** | **1** |  | **1** | **3** |  |
| **40.0** |  | **Sedge swamps and reedbeds on floodplains** | **5** | **3** | **5** | **3** | **5** | **5** | **4** |
| 41.0 | **37** | **Large sedge swamps on floodplains** | **5** | **1** | **5** | **3** | **5** | **5** | **4** |
| 42.0 | **38** | **Reedbeds in floodplains** | **3** | **5** | **5** | 3 | **5** | **5** | **4** |
| 43.0 | **35.01** | **Fens (without sedge swamps and reedbeds)** | **5** | **5** | **5** | **5** | **5** | **5** | **3** |
| **50.0** |  | **Shrubs** | **3** | **3** | **3** | **3** | **3** | **3** |  |
| 51.0 |  | **Scrubs** | **3** | **3** | **5** | **3** | **3** | **3** |  |
| 51.1 | 41.01.02 | (Willow-)scrubs on floodplain | 3 | 5 | 5 | 3 | 3 | 5 | 3 |
| 51.2 | 41.01.03 | Scrubs on wet to damp organic sites | 3 | 3 | 5 | 3 | 5 | 3 |  |
| 51.3 | 41.01.05 | Scrubs on warm dry sites | 3 | 5 | 5 | 3 | 1 | 3 |  |
| 51.4 | 41.01.04 | Scrubs on moist sites | 3 | 1 | 5 | 3 | 3 | 3 |  |
| 52.0 |  | **Copses and Hedges** | **3** | **3** | **3** | **3** | **3** | **3** |  |
| 52.1 | 41.03.03.01,41.02.01 | Copses and hedges on wet to damp organic sites | 3 | 3 | 1 | 3 | 3 | 3 |  |
| 52.2 | 41.03.03.02, 41.02.02 | Copses and hedges on moist sites | 3 | 3 | 1 | 3 | 3 | 3 |  |
| 52.3 | 41.02.03, 41.03.03.03 | Copses and hedges on warm dry sites | **5** | 1 | 5 | 3 | 1 | 3 |  |
| 52.4 | 41.04 | Planted woody vegetation and hedges (introduced species) | 1 | 1 | 1 | 1 | 3 | 1 |  |
| 53.0 | **41.05** | **Single or several trees, avenues** | **3** | **1** | **3** | **3** | **3** | **3** |  |
| 54.0 | **41.06** | **Sparse orchard** | **5** | **1** | **3** | **3** | **3** | **1** |  |
| **60.0** |  | **Forest** | **3** | **3** | **3** | **5** | **5** | **3** |  |
| 61.0 | **43.04** | **Alluvial forest (unspecific)** | **5** | **5** | **5** | **5** | **5** | **5** | **2** |
| 61.1 | 43.04.01 | Riparian forest of alder and ash | 3 | 5 | 5 | 5 | 5 | 5 | 2 |
| 61.2 | 43.04.02 | Softwood alluvial forest | 5 | 5 | 5 | 3 | 5 | 5 | 3 |
| 61.3 | 43.04.03 | Hardwood alluvial forest | 5 | 5 | 5 | 5 | 5 | 5 | 2 |
| 62.0 |  | **Deciduous (mixed) forest** | **3** | **3** | **3** | **5** | **3** | **3** |  |
| 62.1 | 43.07 | Deciduous (mixed) forest on damp to moist site | 3 | 3 | 1 | 3 | 3 | 3 |  |
| 62.2 | 43.08 | Deciduous (mixed) forest on dry or warm sites | 5 | 3 | 5 | 3 | 1 | 1 |  |
| 62.3 | 43.07.02 | Oak-hornbeam forest (LRT 9160) | 5 | 5 | 1 | 5 | 5 | 3 |  |
| 63.0 |  | **Deciduous (mixed) planations** | **1** | **1** | **1** | **3** | **3** | **1** |  |
| 63.1 | 43.09, 43.10 | Deciduous (mixed) planations with predominat introduced tree species | 1 | 1 | 1 | 3 | 3 | 1 |  |
| 63.2 | 43.10.01 | Popular planations | 1 | 1 | 1 | 3 | 5 | 1 |  |
| 64.0 | **42.03** | **Pioneer woodland** | **1** | **1** | **1** | **1** | **3** | **3** |  |
| 65.0 | **44** | **Coniferous woodlands** | **3** | **1** | **3** | **3** | **1** | **1** |  |
| 65.1 | 44.02.02 | Limestone pine forest on gravel bank or alluvial cone | 3 | 1 | 5 | 3 | 1 | 5 | 1 |
| 65.2 | 44.02.03 | Dry sandy pine forest | 3 | 1 | 3 | 3 | 1 | 1 |  |
| 66.0 | **44.04; 44.05** | **Coniferous planations** | **1** | **1** | **1** |  | **3** | **1** |  |
| 67.0 |  | **Carr woodland/Swamp forest** | **3** | **3** | **5** | 5 | **5** | **3** |  |
| 67.1 | 43.02 | Carr woodland | 5 | 5 | 5 | 5 | 5 | 3 |  |
| 67.2 | 43.03 | Swamp forest | 3 | **1** | 5 | 3 | 5 | 3 |  |
| **70.0** |  | **Rocks and other ruderal habitats** | **5** | **5** | **5** | **5** | **1** | **3** |  |
| 71.0 | **31.01** | **Natural caves and rock shelters** | **3** | **5** | **5** | **5** | **1** | **1** |  |
| 72.0 | **32.02, 32.03, 32.04** | **Rocks, boulder fields and scree** | **3** | **5** | **5** | **5** | **1** | **1** |  |
| 73.0 | **32.07** | **Loam and loess banks** | **5** | **1** | **5** | **3** | **1** | **3** |  |
| 74.0 | **60.02** | **Gravel surfaces of the subalpine to alpine zone** | **5** | **5** | **5** | **5** | **5** | **5** | **5** |
| **80.0** |  | **Arable land** | **1** | **1** | **1** |  | **3** | **1** |  |
| 81.0 | 33.01, 33.02, 33.03, 33.04, 33.05 | **Arable land** | **1** | **1** | **1** |  | **3** | **1** |  |
| 82.0 | 33.01.04; 33.02.04; 33.03.04; 33.04.04: 33.05.04 | **Fallow land** | **3** | **1** | **1** |  | **3** | **1** |  |
| **90.0** | **52** | **Settlements** | **1** | **1** | **1** |  | **3** | **1** |  |
